# Supplementary material for: Global MicroRNA Expression Profiling Identifies MiR-210 Associated with Tumor Proliferation, Invasion and Poor Clinical Outcome in Breast Cancer
Source: PLoS One. 2011 Jun 29;6(6):e20980. doi: 10.1371/journal.pone.0020980 (PMC3126805; doi:10.1371/journal.pone.0020980)
Supplement: Table S1 — List of the miRNAs detected in at least 90% of the breast cancer samples. (XLSX) [file pone.0020980.s006.xlsx]

## Sheet: Feuil1
MiRNA Name
hsa_miR_144
hsa_miR_220
hsa_miR_514
hsa_miR_544
hsa_miR_124a
hsa_miR_189
hsa_miR_32
hsa_miR_323
hsa_miR_329
hsa_miR_330
hsa_miR_371
hsa_miR_374
hsa_miR_380_5p
hsa_miR_433
hsa_miR_485_3p
hsa_miR_489
hsa_miR_490
hsa_miR_496
hsa_miR_501
hsa_miR_517b
hsa_miR_518a_2_AS
hsa_miR_518d
hsa_miR_519a
hsa_miR_520a_AS
hsa_miR_520c
hsa_miR_520d
hsa_miR_105
hsa_miR_135b
hsa_miR_136
hsa_miR_139
hsa_miR_202_AS
hsa_miR_211
hsa_miR_212
hsa_miR_216
hsa_miR_219
hsa_miR_299_5p
hsa_miR_337
hsa_miR_340
hsa_miR_369_5p
hsa_miR_372
hsa_miR_376a
hsa_miR_410
hsa_miR_493_5p
hsa_miR_495
hsa_miR_499
hsa_miR_504
hsa_miR_518f_AS
hsa_miR_519d
hsa_miR_520a
hsa_miR_520d_AS
hsa_miR_524_AS
hsa_miR_525
hsa_miR_525_AS
hsa_miR_539
hsa_miR_542_5p
hsa_miR_137
hsa_miR_204
hsa_miR_301
hsa_miR_302b
hsa_miR_328
hsa_miR_377
hsa_miR_381
hsa_miR_412
hsa_miR_431
hsa_miR_432_AS
hsa_miR_487a
hsa_miR_488
hsa_miR_508
hsa_miR_509
hsa_miR_512_3p
hsa_miR_512_5p
hsa_miR_515_5p
hsa_miR_517a
hsa_miR_518c
hsa_miR_518e
hsa_miR_519b
hsa_miR_519e
hsa_miR_519e_AS
hsa_miR_520b
hsa_miR_520g
hsa_miR_520h
hsa_miR_545
hsa_miR_95
hsa_miR_1
hsa_miR_135a
hsa_miR_154_AS
hsa_miR_191_AS
hsa_miR_215
hsa_miR_217
hsa_miR_302a_AS
hsa_miR_302d
hsa_miR_367
hsa_miR_373
hsa_miR_378
hsa_miR_384
hsa_miR_409_5p
hsa_miR_448
hsa_miR_450
hsa_miR_493_3p
hsa_miR_502
hsa_miR_518a
hsa_miR_518f
hsa_miR_522
hsa_miR_524
hsa_miR_527
hsa_miR_133a
hsa_miR_142_5p
hsa_miR_149
hsa_miR_181c
hsa_miR_182_AS
hsa_miR_200a_AS
hsa_miR_296
hsa_miR_302a
hsa_miR_302c
hsa_miR_34c
hsa_miR_373_AS
hsa_miR_380_3p
hsa_miR_455
hsa_miR_507
hsa_miR_510
hsa_miR_518b
hsa_miR_520e
hsa_miR_520f
hsa_miR_526b_AS
hsa_miR_9
